# Supplementary material for: Targeted gene inactivation in zebrafish using engineered zinc-finger nucleases
Source: Springer Nature journal article supplement (doi:10.1038/nbt1398), 2008-05-25
Supplement: 41587_2008_BFnbt1398_MOESM3_ESM.pdf [file 41587_2008_BFnbt1398_MOESM3_ESM.pdf]

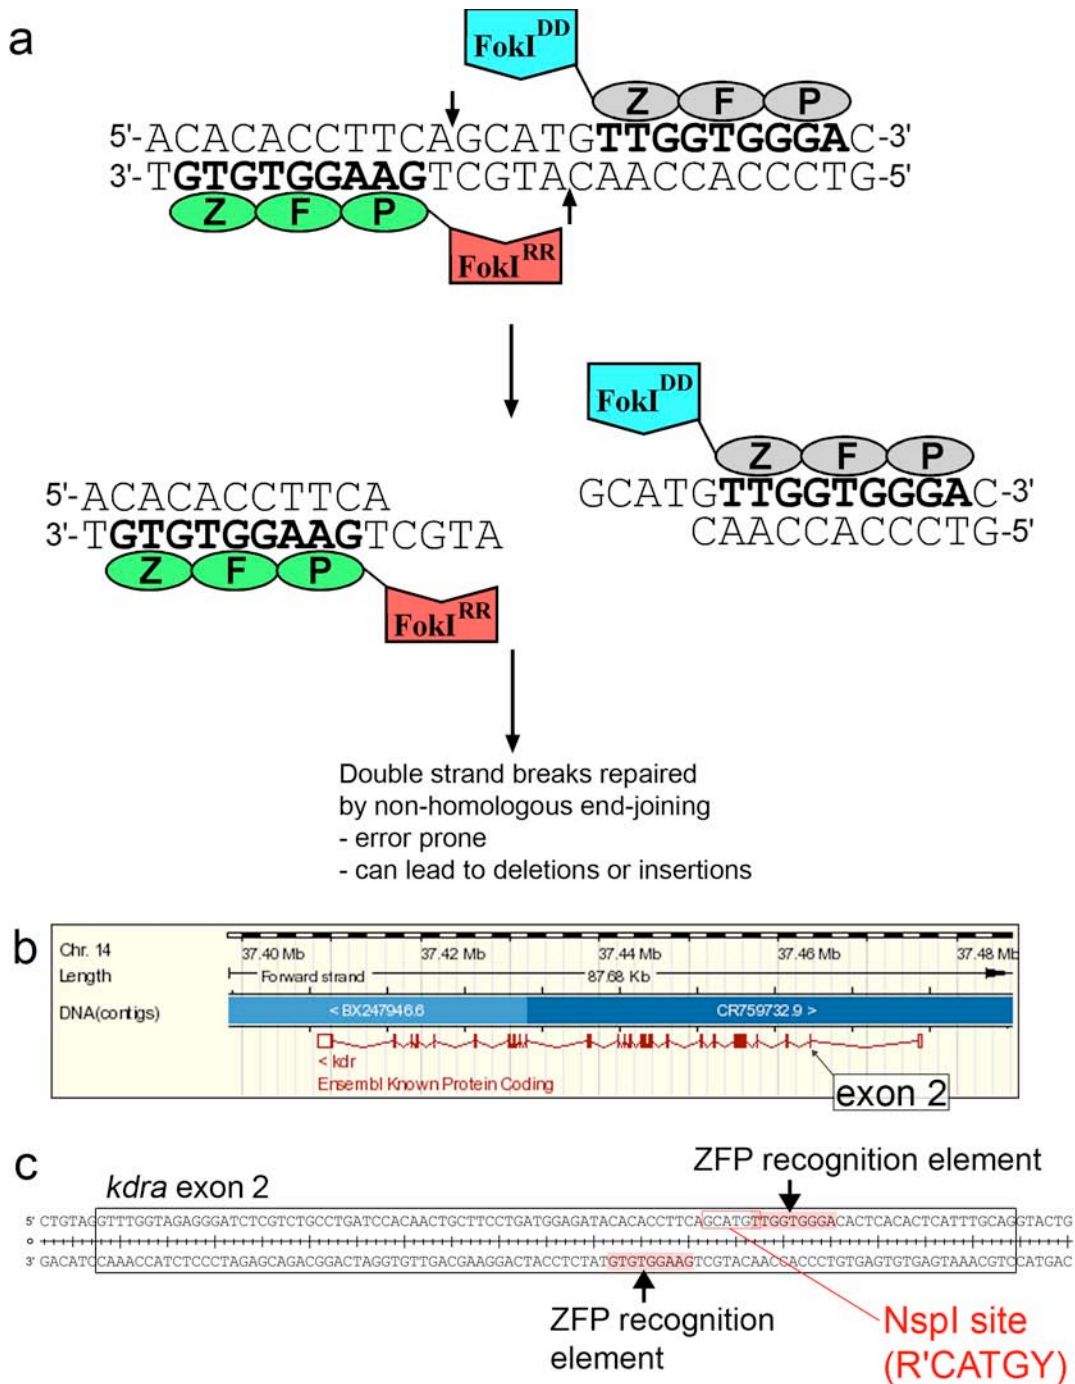

**Supplementary Figure 1.** Targeting the zebrafish *kdra* gene with zinc finger nucleases (ZFNs). **a.** Schematic representation of ZFN induced cleavage. Upon binding, the heterodimeric nucleases will cleave the target DNA (indicated by arrow) leading to a double strand break (DSB). The DSB can then be repaired by non-homologous end-joining (NHEJ). Since this is an error prone repair pathway, NHEJ often results in deletions or insertions at the site of the repaired DSB. **b.** Image from ENSEMBL Genome browser showing the *kdra* locus. Position of exon 2 is indicated. **c.** Sequence of *kdra* exon 2. Target zinc finger recognition sites and the NspI restriction site are indicated.

## Supplementary Figure 2.

Algorithm for the identification of favorable ZFN recognition sequences. A simple PERL script was constructed that allows an enduser to input a series of Exon sequences for a gene of interest (fasta format) and set thresholds for the number of purines and guanines required for the identification of suitable pairs of 9bp ZFP recognition elements. This program will output a "hit" list in sequential order that can be evaluated by the enduser with regards to position and quality of the target sites for the most favorable set of ZFPs to create. This program differs from other webtools, ZiFiT ([bindr.gdcb.iastate.edu/ZiFiT/](http://bindr.gdcb.iastate.edu/ZiFiT/)) and Zinc Finger Tools ([zincfingertools.org](http://zincfingertools.org)), in that it only considers the number of purines in the site, which we believe is a hallmark of a favorable ZFP recognition site. The other zinc finger tools consider sites that are compatible with preexisting zinc finger modules that can be assembled to generate ZFPs with a desired specificity. The file "kdra\_exons\_fasta.txt" can be used as test input for this program. The PERL program creates output file "tempout.txt" in the current working directory.

```
#!/usr/bin/perl -w
#
use strict;

# test file use 'kdra_exons_fasta.txt';

####
#
# input statements
#
####

print "\nProgram creates output file : tempout.txt : in current directory with output\n\n";

print "Enter Exon file Name (Must be in fasta format plain text w/line breaks): ";

my($ZFlist) = "";

$ZFlist= <STDIN>;

chomp $ZFlist;

print "Enter the minimum number of purines per composite site: ";

my($purinecount) = "";

$purinecount= <STDIN>;

chomp $purinecount;

$purinecount = $purinecount - 1;
```

```

print "Enter the minimum number of guanines per composite site: ";

my($guaninecount) = "";

$guaninecount= <STDIN>;

chomp $guaninecount;

$guaninecount = $guaninecount - 1;

###
# open output file
#

open (OUTFILE, ">tempout.txt");

###

my($revcom)=", my($x)=0, my($ii)=0,
my($r1)=0,my($r2)=0,my($y1)=0,my($y2)=0,my($i)=0;
my($fastahead)=", my($fastaseq)=", my($temp)=", my($temp5)=", my($temp3)=";
my($invprimerlist) = ";
my($header) = ";
my($headlength)=0;

open(ZFL, $ZFlist);

while ( $fastahead= <ZFL> ) {

###
# Extract header

chomp $fastahead;

$headlength = length ($fastahead) -1;

$header = substr ($fastahead, 1, $headlength);

#
###
# Extract exon sequence
#
$fastaseq= <ZFL>;

$x = 0, $i=0, $temp = "", $ii = '18 to 21';

$fastaseq =~ s/\s//g;

$x = length $fastaseq;

##

```

```

# Analyze 24 bp blocks (6bp gap) for composition of ZFP sites

while ($i < ($x -24)) {

$r1=0, $r2=0, $y1=0, $y2=0;

$temp = substr ($fastaseq, $i, 24);

$temp5 = substr ($fastaseq, $i, 9);

$temp3 = substr ($fastaseq, $i + 15, 9);

while ( $temp3 =~ /a/ig) {$r2++}
while ( $temp3 =~ /g/ig) {$r1++}
while ( $temp5 =~ /c/ig) {$r1++}
while ( $temp5 =~ /t/ig) {$r2++}

$y1 = $r1 + $r2;

if ($y1 > $purinecount && $r1 > $guaninecount) {

$revcom = reverse $temp5;

$revcom =~ tr/ACGT/TGCA/;

print OUTFILE $header, "\n", "Site position ", $i, "\n", "6bp gap", "\nComposite site: ",
$temp, "\n5' ZFP site:  ", $revcom, "\n3' ZFP site:  ", $temp3, "\nPurines in site: ", $y1,
"\nGuanines in site: ", $r1, "\n\n";

}

$i++;

}

###
# Analyze 23 bp blocks (5bp gap) for composition of ZFP sites

$i = 0;

$x = length $fastaseq;

while ($i < ($x - 23)) {

$r1=0, $r2=0, $y1=0, $y2=0;

$temp = substr ($fastaseq, $i, 23);

$temp5 = substr ($fastaseq, $i, 9);

$temp3 = substr ($fastaseq, $i + 14, 9);

```

```
while ( $temp3 =~ /a/ig) {$r2++}
while ( $temp3 =~ /g/ig) {$r1++}
while ( $temp5 =~ /c/ig) {$r1++}
while ( $temp5 =~ /t/ig) {$r2++}

$y1 = $r1 + $r2;

if ($y1 > $purinecount && $r1 > $guaninecount) {

$revcom = reverse $temp5;

$revcom =~ tr/ACGT/TGCA/;

print OUTFILE $header, "\n", "Site position ", $i, "\n", "5bp gap", "\nComposite site: ",
$temp, "\n5' ZFP site: ", $revcom, "\n3' ZFP site: ", $temp3, "\nPurines in site: ", $y1,
"\nGuanines in site: ", $r1, "\n\n";

}

$i++;

}

}

print "\nOutput placed in tempout.txt\n";

close ZFL;

close OUTFILE;

exit;
```

### Supplementary Figure 3.

Sequence analysis of clones in selected single finger library pools. Sequences of a small number of fingers (recognition helix positions -1 through 6) from each Stage 1 finger selection. Selected positions in each finger are indicated in bold. The pool of clones isolated from the finger 3 selection against the TTG subsite (Finger 3-TTG) within the 9 bp recognition element **TTGGTGGGA** does not display as tight a consensus as the other sets of selected fingers. It appears that this is a more challenging site for zinc finger recognition based on our efforts to improve this finger through further selection beyond that described herein (Meng, X and Wolfe, SA *unpublished results*).

Fingers selected against 3 bp subsites in target **GAAGGTGTG**

#### Finger 1-GTG subsite

Only a single position is randomized in the finger so the raw library was recombined prior to the second selection stage.

#### Finger 2-GGT subsite

CRHHLTR

LKHHLTR (3 unique codon sets)

QKHHLTR

LRHHLTR (3 unique codon sets)

#### Finger 3-GAA subsite

QGANLTR

QGANLTR

QLCNLTR

QHGNLXR

QACNLTR

QSSNLTR

QSHNLTR

QNGNLTR

Fingers selected against 3 bp subsites in target **TTGGTGGGA**

#### Finger 1-GGA subsite

CSGHLTR

IQGHLTR

QKGHLTR

IKGHLTR

QQGHLTR

CKGHLTR (2 duplicates)

TKGHLTR

**Finger 2-GTG subsite**

Only a single position is randomized in the finger so the raw library was recombined prior to the second selection stage.

**Finger 3-TTG subsite**

RSDGLWL

RSDQLVV

RSDRLFT

RSDYLLF

RSDPLKL

RSDWLFV

RSDGLSA

### Supplementary Figure 4.

Sequences of the recognition helices from ZFPs selected to recognize the GAAGGTGTG recognition element. Bold residues indicate selected positions. An arrow indicates the clone used within the ZFN1 to target exon 2 in *kdra*. Names beside the sequences indicate clones characterized by binding site selections (Supplementary Fig. 6).

|                         | Finger1             | Finger2         | Finger3         |             |
|-------------------------|---------------------|-----------------|-----------------|-------------|
|                         | -1123456            | -1123456        | -1123456        |             |
| Selected<br>Clones      | → RSD <b>A</b> LTR  | <b>L</b> RHHLTR | <b>Q</b> KANLTR | <b>ZFP1</b> |
|                         | RSD <b>A</b> LTR    | <b>L</b> RHHLTR | <b>Q</b> RDNLTR |             |
|                         | RSD <b>A</b> LTR    | <b>L</b> CHHLTR | <b>Q</b> RGNLTR |             |
|                         | RSD <b>G</b> LTR    | <b>L</b> SHHLTR | <b>Q</b> SSNLTR |             |
|                         | RSD <b>G</b> LTR    | <b>L</b> KHHLTR | <b>Q</b> RGNLTR |             |
|                         | RSD <b>G</b> LTR    | <b>L</b> RHHLTR | <b>Q</b> IGNLTR |             |
|                         | RSD <b>G</b> LTR    | <b>C</b> KHHLTR | <b>Q</b> LGNLTR | <b>ZFP3</b> |
|                         | RSD <b>S</b> LTR    | <b>C</b> RHHLTR | <b>Q</b> SSNLTR |             |
|                         | RSD <b>A</b> LTR    | <b>C</b> AHHLTR | <b>Q</b> LSNLTR |             |
|                         | RSD <b>A</b> LTR    | <b>C</b> AHHLTR | <b>Q</b> RGNLTR |             |
|                         | RSD <b>S</b> LTR    | <b>C</b> GHHLTR | <b>Q</b> RGNLTR |             |
|                         | RSD <b>S</b> LTR    | <b>C</b> PHHLTR | <b>Q</b> LGNLTR |             |
|                         | RSD <b>A</b> LTR    | <b>C</b> AHHLTR | <b>Q</b> LANLTR |             |
|                         | RSD <b>A</b> LTR    | <b>F</b> KHHLTR | <b>Q</b> SSNLTR |             |
|                         | RSD <b>A</b> LTR    | <b>M</b> RHHLTR | <b>Q</b> HGNLTR |             |
|                         | RSD <b>A</b> LTR    | <b>V</b> GHHLTR | <b>Q</b> RGNLTR |             |
| Consensus               | RSD <b>a</b> LTR    | <b>x</b> +HHLTR | <b>Q</b> ?gNLTR |             |
| Target Site<br>3' to 5' | 3'- GTG TGG AAG -5' |                 |                 |             |



### Supplementary Figure 5.

Sequences of the recognition helices from ZFPs selected to recognize the TTGGTGGGA recognition element. Bold residues indicate selected positions. An arrow indicates the clone used within the ZFN2 to target exon 2 in *kdra*. A clone (ZFP5) with Glu at position 3 in finger 2 was characterized, since this is the consensus residue at this position, but it preferred C over T in the binding site selections (Supplementary Fig. 6) and so was not utilized.

|                         | Finger1             | Finger2          | Finger3                   |         |
|-------------------------|---------------------|------------------|---------------------------|---------|
|                         | -1123456            | -1123456         | -1123456                  |         |
| Selected<br>Clones      | → <b>QKGHLTR</b>    | RSD <b>A</b> LTR | RSD <b>S</b> LL <b>G</b>  | ZFP2    |
|                         | <b>QKGHLTR</b>      | RSD <b>E</b> LTR | RSD <b>M</b> LL <b>G</b>  |         |
|                         | <b>QQGHLTR</b>      | RSD <b>S</b> LTR | RSD <b>E</b> L <b>S</b> E |         |
|                         | <b>QKGHLTR</b>      | RSD <b>E</b> LTR | RSD <b>M</b> LL <b>G</b>  |         |
|                         | <b>QLGHLTR</b>      | RSD <b>A</b> LTR | RSD <b>M</b> L <b>G</b> S |         |
|                         | <b>QRGHLTR</b>      | RSD <b>A</b> LTR | RSD <b>L</b> LL <b>L</b>  | ZFP4    |
|                         | <b>QKGHLTR</b>      | RSD <b>F</b> LTR | QSS <b>D</b> L <b>Q</b> R |         |
|                         | <b>CWGHLTR</b>      | RSD <b>G</b> LTR | RSD <b>V</b> L <b>Q</b> W |         |
|                         | <b>CKGHLTR</b>      | RSD <b>E</b> LTR | RSD <b>A</b> L <b>G</b> L | ZFP5    |
|                         | <b>CKGHLTR</b>      | RSD <b>E</b> LTR | RSD <b>C</b> L <b>Y</b> T |         |
|                         | <b>CKGHLTR</b>      | RSD <b>E</b> LTR | RSD <b>A</b> L <b>R</b> L |         |
|                         | <b>SKGHLTR</b>      | RSD <b>A</b> LTR | RSD <b>R</b> L <b>S</b> F |         |
|                         | <b>SKGHLTR</b>      | RSD <b>E</b> LTR | RSD <b>S</b> L <b>Q</b> G |         |
|                         | <b>SKGHLTR</b>      | RSD <b>V</b> LTR | RSD <b>C</b> LL <b>G</b>  |         |
|                         | <b>HKGHLTR</b>      | RSD <b>E</b> LTR | RSD <b>S</b> L <b>F</b> L |         |
|                         | <b>HKGHLTR</b>      | RSD <b>S</b> LTR | QSS <b>D</b> L <b>Q</b> R |         |
|                         | <b>AKGHLTR</b>      | RSD <b>E</b> LTR | RSD <b>A</b> LL <b>S</b>  |         |
|                         | <b>NKGHLTR</b>      | RSD <b>G</b> LTR | RSD <b>G</b> L <b>K</b> G |         |
|                         | <b>AKGHLTR</b>      | RSD <b>E</b> LTR | RSD <b>A</b> LL <b>S</b>  |         |
|                         | Consensus           | ? <b>k</b> GHLTR | RSD <b>e</b> LTR          | RSD?L?? |
| Target Site<br>3' to 5' | 3'- AGG GTG GTT -5' |                  |                           |         |

## Supplementary Figure 6.

Binding site analysis for ZFPs indicated in Supplementary Figures 5 & 6. Raw sequences of the selected binding sites are listed first followed by the overrepresented motif present in the MEME alignment. The Sequence logo for clones not used in each ZFN is present below each alignment.

**ZFP1 – ZFP used in ZFN1** (RSDALTR LRHHLTR QKANLTR) DNA-binding site selection results (27 clones)

Raw sequences:

```
GTCCACACAGGCCGACAACACACCACCA
GCCCTGACAGTTTGATCCACACCCGCA
GCTCCCCACCACTACGACCACACCCTCG
CACTCGCCACGTTTGAGAAGGTGCGGC
GTCCACGCGCAAACCACACCATCACCC
CTTGTGATCCCGGGACCCACACCCTCA
ACGCCAAAACGCCCCACACACCCTCACC
CCCTACACACCTCCCCGCACCCTCACCA
ACCGCGACCACGTTAGGTGGTGTGGAAC
GCCATTCCGACTATGCGGGGGTGTGGTG
GACTTACCACGGGACGAAGGTGCGCCTA
ACGGAGCCAGCACACCACACCCTCACTG
ATCTCTGGTCGAAACGAAGGTGTGGAAC
TGGGTGATTTGCGCGCCCACACCACCGC
TTGAGGCAGATATGCACACACCCTCATA
AGGCCCGAGGGTGTGTTGCGCCCGCGGCT
CAACCCGACTGAGTCGATACCACACCCT
ACGCTAGGAACACTTAGGAGGGTGTGGC
ACGGCATCCACTAACTCCCACACCCCCAC
CTGCCACACCTTCATAGCACTGTCCCGA
CGCAGCATTTATCCCCACACCACCCCA
CAACCCGACTGAGTCGATACCACACCCTC
CGCGTACCCTGCTTTACTCCACACCACCC
GCAGCAGAGGGTGTGTCAGCTCCCAAAT
TACCACACCCCGATAAACACACCCTCCC
CGGACTTCAGTCCTCCCACACCCTCCCA
CAAACACCGAAAACCCACCACACCCCA
```

MEME identified the DNA-binding motif from 26 clones (E-value=7.6e-056)(Note: the motif is reverse complementary to the target site (GAAGGTGTG))

```
TTCAGTCCTCCACACCCTCCA
TGAGTCGATACCACACCCTC
      GCCACACCCTCCTAAGTGTTT
AGCCAGCACACCACACCCTCACTG
TCCCGGGACCCACACCCTCA
ACCACTACGACCACACCCTCG
```

CACGCGCAA**ACACACCAT**CACCC  
CCCCGATA**AAACACACCCT**CCC  
TTGGGAGCT**ACACACCCT**CTGCTGC  
CCGCGGGCG**AAACACACCCT**CGGGCCT  
GCAGATATGC**ACACACCCT**CATA  
AAAACGCC**ACACACCCT**CACC  
          CTG**CCACACCTT**CATAGCACTGT  
          GTT**CCACACCTT**CGTTTCGACCA  
CGAAAACCC**ACACACCCCA**  
CCACTAACT**CCACACCCCA**C  
          **CACACACCCCA**GCATAGTCGG  
CTGCTTTACT**CCACACCACCCCA**  
GCATTTATCC**CCACACCACCCCA**  
ATTTGCGCG**CCACACCACCGC**  
          GTT**CCACACCACCT**AAACGTGGTC  
CAGGCCGACA**ACACACCACCA**  
          CCCT**ACACACCTCC**CCGCACCCTC  
ACAGTTTGAT**CCACACCCGA**  
          **GCCGCACCTT**CTCAAACGTGG  
          TAG**GCGCACCTT**CGTCCCGTGGT

For Sequence Logo see Figure 1c.

**ZFP2 – ZFP used in ZFN2 (QKHLTR RSDALTR RSDSLLG) clone**  
DNA-binding site selection result (22 clones)

Raw sequences:

CGAACTGAGGTAGTAA**ACCCACCACCC**  
ACCTTGCGCGCACGACCGGTGGGAAGGT  
GCATACCGGAACGTTAACAGGGGGAAGA  
CTCAACACCGGTCTCAAGGGTGGGAAAC  
TCCCCATGGTGGGAGAGCACAGACTCAG  
GATACATAAATTAAACACGGAGGGATGG  
CAACCCTATGACACCCTCCACCACACT  
AATGTTCTCGCGATCTTGGTGGGACTAG  
GCGTTTCACTGTGGCCCGTCCACCATT  
ACTAAGCACAGCGCCACCTATCGACCG  
GCACCAGGCGTAGCATAACGGTGGGACTC  
TAGGCCCCGGTGGGACCCGTACTACCTA  
GAGGGCCGCAGGAACTCCACCAGAGACA  
GTAATCGATCGCTCACCTGGTGGGTTGG  
CCACCACGGATAACACAAACCCACCATA  
ACACCCCGCTGGAGTGCAACCAATCAG  
CGATATCCGTCTATGACATCCACCCGA  
CCATTTGGCCGTCACCTTGGTGGGATAC  
CACAGAGGTAATGGAGCGGTGGGACGCG  
GCAACCCTTGGAAAAACATCCACCAGGC

GGATCAACCACGCAATCACGGAGGGATG  
ATTGAGCACCAGGATAGGGTGGGACCCA

MEME identified the DNA-binding motif from 22 clones (E-value=2.1e-025)

GCCGTCACCT**TGGTGGG**AATAC  
          AAT**TGGTGGG**ACGGGCCACAG  
CTCGCGATCT**TGGTGGG**ACTAG  
          AGT**TGGTGGG**AGGGTGTTCATA  
          TCCCAT**TGGTGGG**AGCACAGAC  
          GC**GGTGGG**ATGTTTTTCCA  
GGTAATGGAG**GGTGGG**ACGCG  
          TGTCT**GGTGGG**AGTTCCTGCGG  
          TAGGCCCC**GGTGGG**ACCGTACTAC  
GCGTAGCATA**GGTGGG**ACTC  
CGCGCACGAC**GGTGGG**AAGGT  
CACCAGGATA**GGGTGGG**ACCCA  
          TC**GGGTGGG**ATGTCATAGAC  
CCGGTCTCA**GGGTGGG**AAC  
          TAT**GGTGGG**TTTGTGTTATC  
ATCGCTCACCT**GGTGGG**TGG  
          GG**TGGTGGG**TTTTACTACCT  
CACGCAATCAC**GGAGGG**ATG  
AAATTAACAC**GGAGGG**ATGG  
          CGGTCGAT**AGGTGGG**CGCTGTGCTTA  
          CTGAT**TGGTTGCA**CTCCAGCGGG  
GGAACGTTAAC**AGGGGG**AGA

For Sequence Logo see Figure 1c.

**ZFP3** (RSD**AL**TR CA**H**HLTR **QL**SNL**TR**) clone DNA-binding site  
selection result (21 clones)

Raw sequences:

ACGCAAGAGGGTGTGTCAACGGTAAGTG  
AGTTATCCAAAGTAACACACCTTCAGCA  
GTGGCCAGAAAATGAGAAGGTGCGGAGA  
AAGCGACGCCAAACCTGAAGGTGTGTTA  
CTACCGCCTCTCCGAACACACCTTCGCT  
ACGCCAAAACGCCCCACACACCTTCACC  
TTACCCAAACTACCCCCACACCTTCCCC  
GTTTGACCATTGCAACCACACCTTCAAC  
GGTACCAGCACGTCAAACACACCTCA  
GCAACGGAAGGTGTGAGGAATACCCACG  
AGTAGTGAAGGGGTGGATGACAAAACCTG  
AGGCCCGAGGGTGTGTTTCGCCCGCGGCT

ACACCTTATCTTGTATGAAGGTGCGGGT  
 ACGCTAGGAACACTTA<sub>g</sub>GAGGGTGTGGc  
 ATGTCCCGGGCAAAGTGAAGGTGTGGGC  
 CCCACACCAGGACAAGCCACACCCTCA  
 CGTCACCATTACACAACACACCTTCACC  
 AACTGTGACATCTACCACACCTTCATC  
 ATAGTTACTCGTCTACACACCTTCATAC  
 GACACAGTAACGGAAGAGGGTGTGATGC  
 CTGCCACACCTTCATAGCACTGTCCCGA

MEME identified the DNA-binding motif from 21 clones (E-value=1.7e-055)(Note: the motif is reverse complementary to the target site (GAAGGTGTG))

TTACTCGTCT**ACACACCTTC**ATAC  
 CCATTACACA**ACACACCTTC**ACC  
           TA**ACACACCTTC**AGGTTTGGCGT  
 ATCCAAAGTA**ACACACCTTC**AGCA  
           CT**GCCACACCTTC**ATAGCACTGTC  
 GTGACATCTA**CCACACCTTC**ATC  
           **GCCACACCTTC**ACTTTGCCCGG  
 ACCATTGCA**ACCACACCTTC**AAC  
 AGCACGTCAA**ACACACCTTC**A  
 AAAACGCC**CCACACCTTC**ACC  
 CCAGGACAAG**CCACACCTTC**A  
 CAAACTAC**CCACACCTTC**CCC  
 GCCTCTCCGA**ACACACCTTC**GCT  
 CTTACCGTT**ACACACCTTC**TGCGT  
           **ACCCGCACCTTC**ATACAAGATAA  
           **GGCCACACCTTC**CTAAGTGTTC  
 CCGCGGGCGA**ACACACCTTC**GGCCT  
 GTTTTGT**CCACCCCTTC**ACTACT  
 TGGGTATT**CTCACACCTTC**CGTTGC  
           GC**TCACACCTTC**TCCGTTACTG  
           T**CTCCGCACCTTC**TCATTTTCTGG

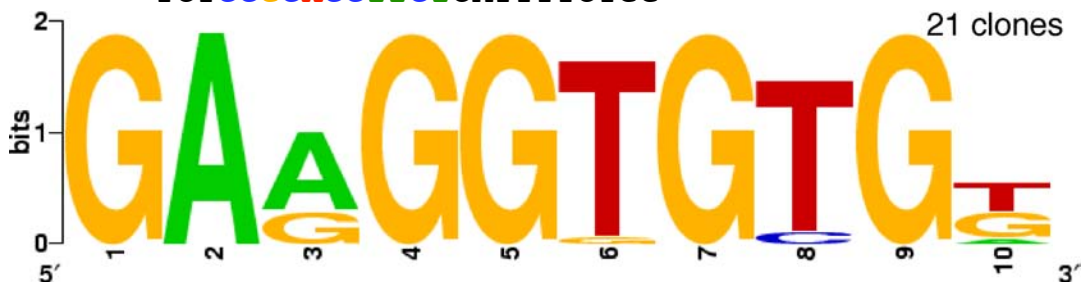

**ZFP4** (QRGHLTR RSDALTR RSDL<sub>LLLL</sub>) DNA-binding site selection result (23 clones)

Raw sequences:  
 CGTTAGTGCTTACGAAGTATGGTGGGTT

AAAACCGAGTGGTGGGACCAGAACAATG  
TAGTCCATGATTTTGGAGTCCCACCGTG  
ACAAGATCAGCCATACCCGGTGGGATTC  
ACAAGCCCGGTGGGAGCCACATAAGACT  
CCAAGTGGGTTTCCGCCGGTGGGACCAC  
TCGGCCTGGTGGGAACCCCGGATGCACT  
ACCAAACACATGAAAATCCCACCAATAA  
AGCAGTGGCCAATGGACCGGTGGGACG  
TGCACATGGTGGGACCCAACAAAGATCA  
GGCATTATGGTGGATCTCCAGGACAAG  
GGTCACATGTCCGAACCATCCCACCAGA  
CACCTTGTCTCCTAACCGGTGGGACTAC  
CACGCGTTGGTAGGGACACGGTGGGCACC  
AGAAACCTGGTGGAAAGAAACACCCTG  
GCTACAAGCACTGAGTCCCACCGAATA  
ACGAATGGAGGGATATAAGGTGGACTTG  
ACCGGTAGGATACTGCATCGGTGGGACC  
CGCACTTGCCAGCCGTCCCACCACCGA  
CCACGGTATTACATACACGGTGGGAGAG  
CCAGAGTTCAGTGAAACCCATGGTGGGAC  
CACATCATAAACAGCCACCCACCACCCG  
GCCGAAGGAACATGACCTGGAGGGATGG

MEME identified the DNA-binding motif from 23 clones (E-value=1.7e-037)

GTGAAACCCATGGTGGGAC  
TCGGTGGTGGGACGGCTGGGCA  
TCTGGTGGGATGGTTCGGAC  
TGCACATGGTGGGACCCAACAAAG  
TTATGGTGGGATTTTCATGTG  
TCGGCCTGGTGGGAACCCCGGATG  
AAAACCGAGTGGTGGGACCAGAACAAT  
ATTACATACACGGTGGGAGAG  
GATACTGCATCGGTGGGACC  
TATTCGGTGGGACTCAGTGCTT  
GTCTCCTAACCGGTGGGACTAC  
CCCAATGGACCGGTGGGACG  
GGGTTTCCGCCGGTGGGACCAC  
ACAAGCCCGGTGGGAGCCACATAAG  
CAGCCATACCCGGTGGGATTC  
CACGGTGGGACTCCAAAATC  
CGGGTGGTGGGTGGCTGTTTAT  
TTACGAAGTATGGTGGGT  
AGAAACCTGGTGGAAAGAAACACCC  
GAACATGACCTGGAGGGATGG  
ACGAATGGAGGGATATAAGGTGG  
GGTAGGGACACGGTGGGCACC

GGCATTATGGTGGATCTCCAGGACA

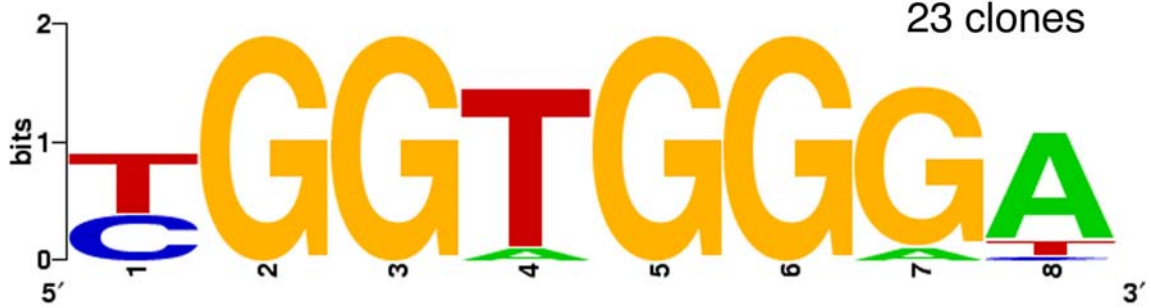

**ZFP5** (CKGHLTR RSD~~E~~LTR RSDALGL) DNA-binding site selection results (6 clones)

Raw sequences:

```
AGACTACGAAGCGCACCAGGCGGGATCC
ATAGCGAGAATTGACCCCTGGCGGGATC
TAACAGctGcccGTGcCgtggCGGGATCC
TATACCACGTTCCCAACCCGGCGGGATT
GTTCAACAACCCACAGCCAAGGCGGGATCC
ACCTTGCAATGGAATTAAGGTGGGATCC
```

MEME identified the DNA-binding motif from 6 clones (E-value=2e-006)

```
AAGCGCACCAGGCGGGATCC
CCACAGCCAAGCGGGATCC
ATTGACCCCTGGCGGGATC
CCCGTGCCGTGGCGGGATCC
ATGGAATTAAGGTGGGATCC
TTCCCAACCCGGCGGGATT
```

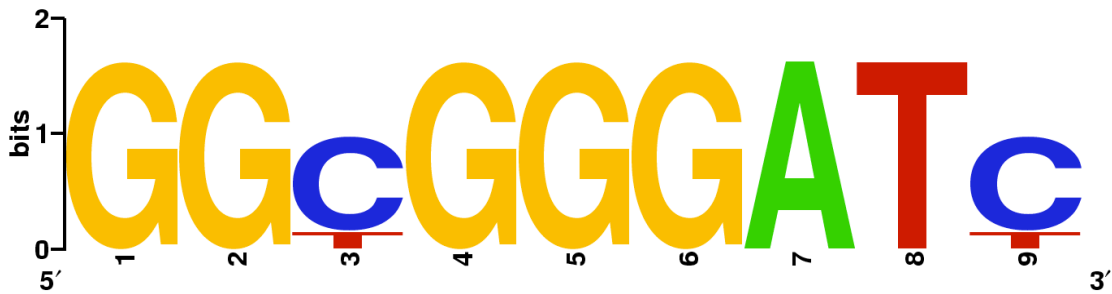

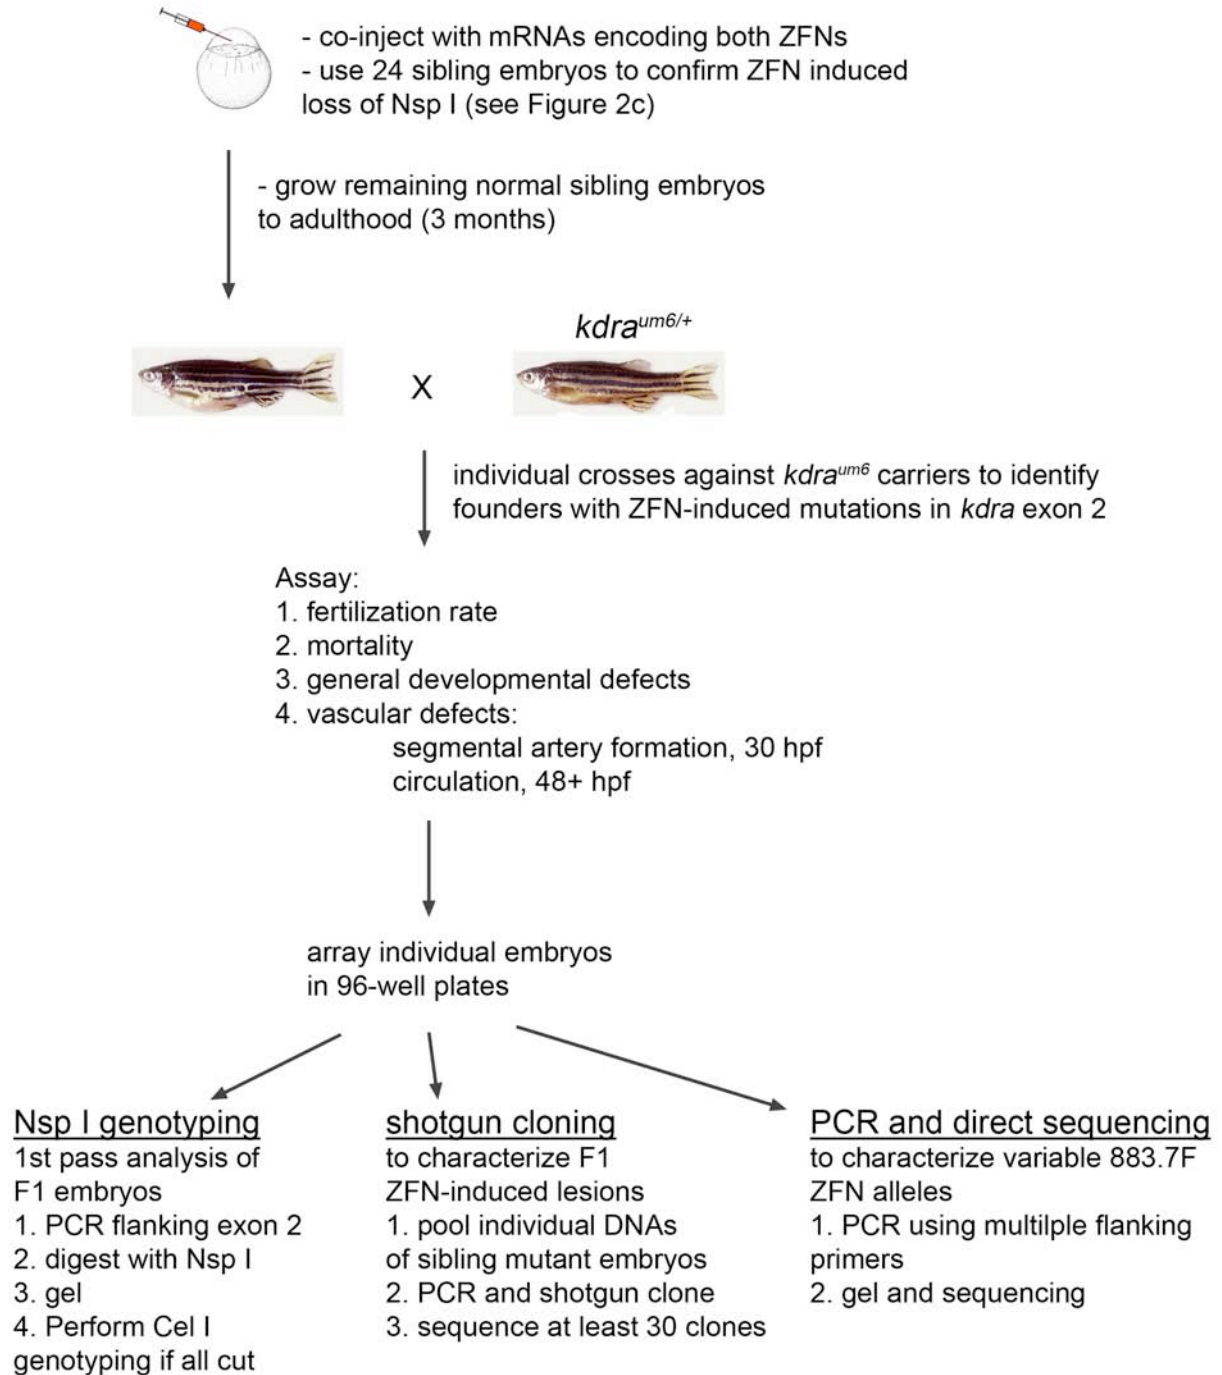

**Supplementary Figure 7.** Experimental approach for the analysis of F1 founders bearing ZFN-induced alleles at the *kdra* locus.



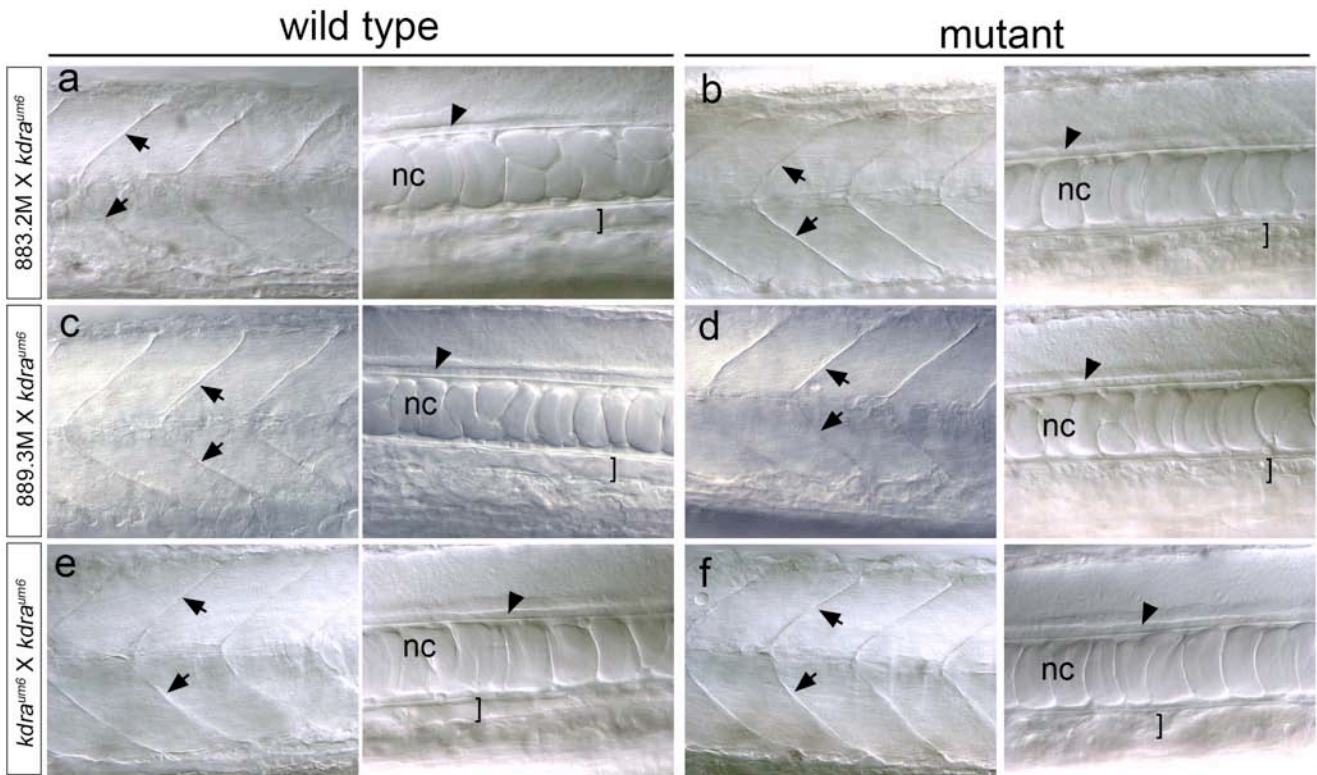

**Supplementary Figure 8.** Nomarski images of trunk morphology in wild type and mutant embryos derived from ZFN founders. In all panels, arrows indicate somite boundaries, arrowhead denotes floor plate, nc - notochord and bracket indicates lumen of the dorsal aorta. Left and right paired panels are from the same embryos in each case. **a.** Wild type embryo from 883.2M. **b.** Mutant embryo from 883.2M. **c.** Wild type embryo from 889.3M. **d.** Mutant embryo from 889.3M. **e.** Wild type embryo from incross of *kdra<sup>um6</sup>* heterozygotes. **f.** Mutant embryo from from incross of *kdra<sup>um6</sup>* heterozygotes. General trunk morphology appears normal in all cases, including mutant embryos. Dorsal aorta lumenization is not apparent in mutant embryos.

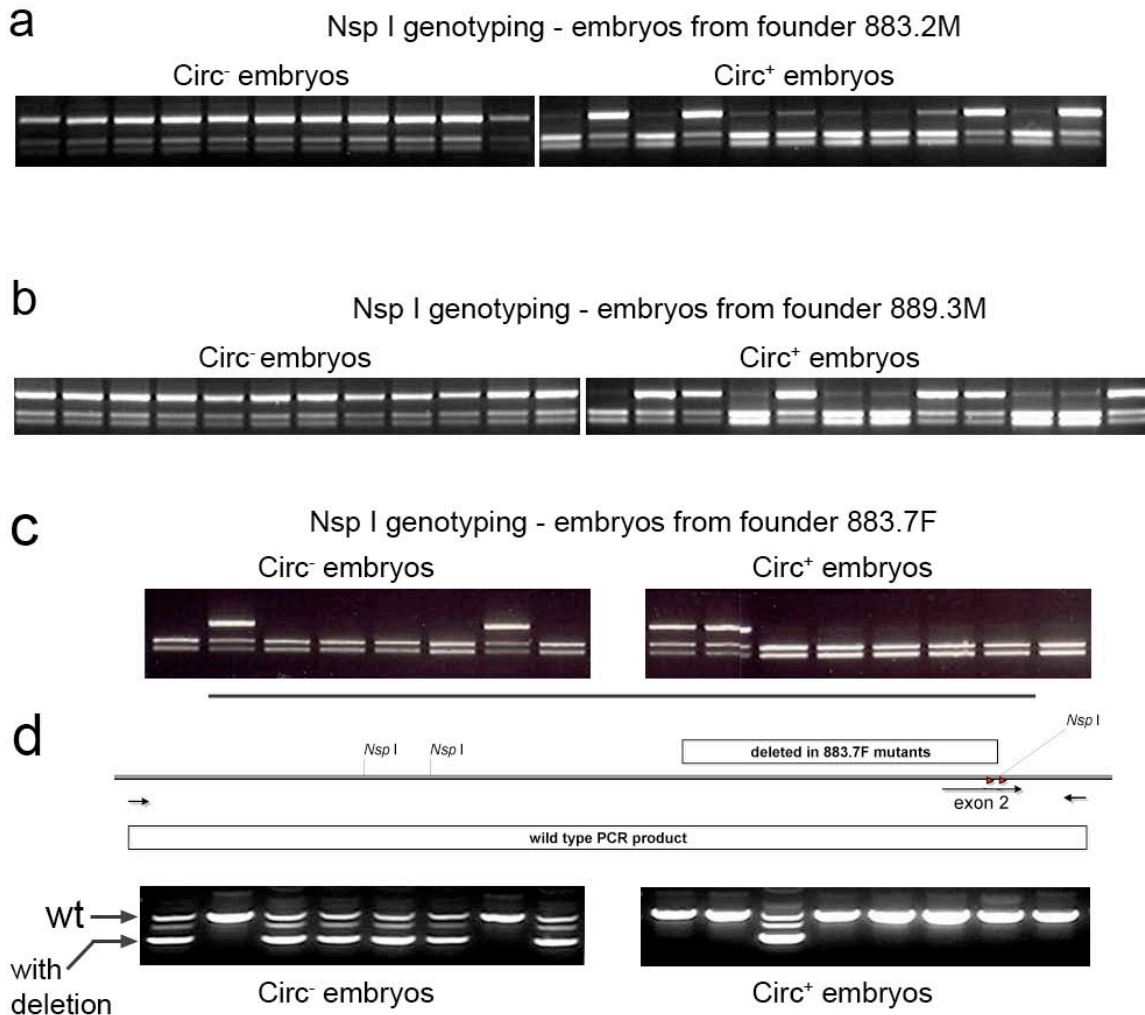

**Supplementary Figure 9.** Genotype analysis of embryos from F1 founders bearing ZFN-induced *kdra* alleles. In all panels, Circ<sup>-</sup> indicates phenotypically mutant embryos that lack circulation at 48 hours post fertilization (hpf); Circ<sup>+</sup> embryos display normal circulation at 48 hpf. **a.** NspI genotyping (see Figure 2) of embryos derived from a cross between founder 883.2M and a *kdra*<sup>um6</sup> heterozygous female. All Circ<sup>-</sup> embryos bear an NspI-resistant allele indicative of a ZFN-induced lesion at this site. **b.** NspI genotyping of embryos derived from a cross between founder 889.3M and a *kdra*<sup>um6</sup> heterozygous female. As above, all Circ<sup>-</sup> embryos bear an NspI-resistant allele. **c.** NspI genotyping of embryos derived from a cross between founder 883.7F and a *kdra*<sup>um6</sup> heterozygous male. In this case, only a fraction of the Circ<sup>-</sup> embryos display a NspI-resistant allele, suggesting the existence of multiple ZFN-induced alleles in the germ cells of the 883.7F founder. **d.** PCR genotyping of the same embryos in c. using flanking primers. Mutant embryos that displayed apparently wild type NspI genotypes show a smaller fragment suggesting a 300 to 400 bp deletion. The original primers used for NspI genotype analysis in c. would fail to amplify the mutant allele in embryos bearing this deletion. Thus, founder 883.7F bears two distinct alleles: a 382 bp deletion and a 12 bp deletion.

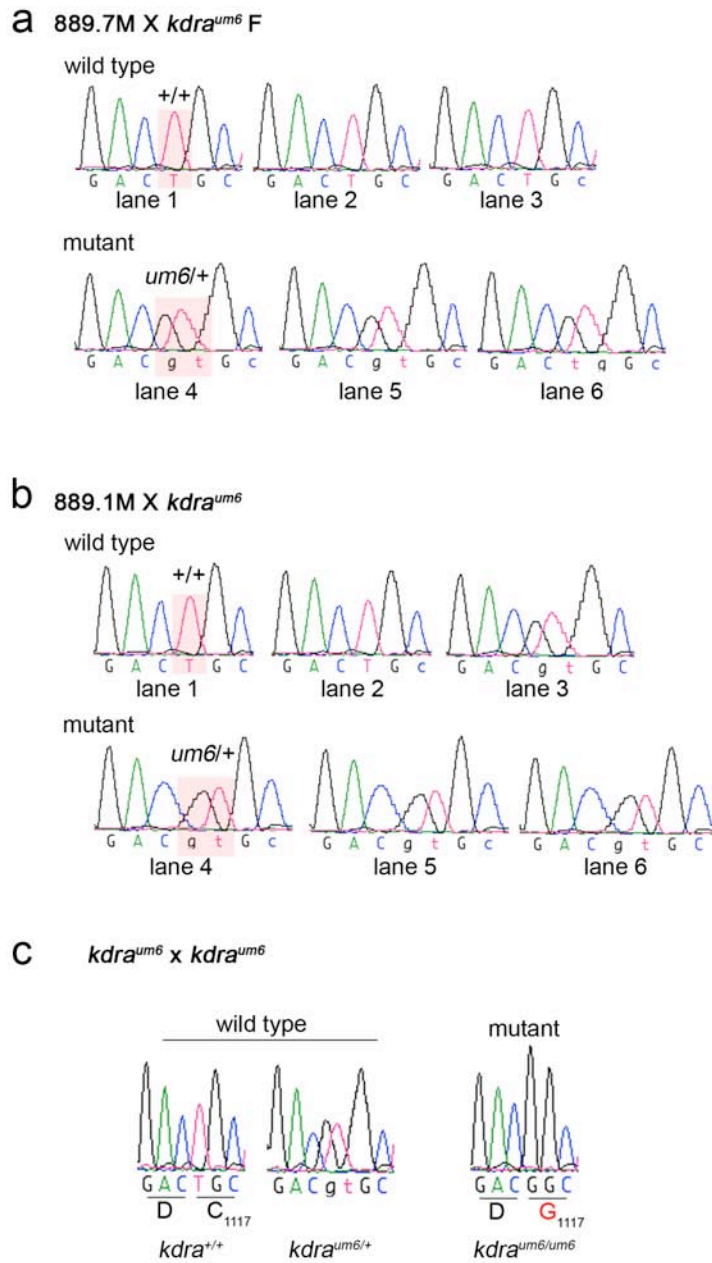

**Supplementary Figure 10.** SNP analysis for genotyping the *kdra*<sup>um6</sup> allele. All chromatograms are from direct sequencing of PCR products amplified from wild type or mutant embryos from the indicated crosses. **a.** Genotypes from embryos of a cross between 889.7M and a *kdra*<sup>um6</sup> heterozygous female. Embryos are the same as shown in Figure 4 (Lane numbers are indicated). Wild type and heterozygous sequences are indicated by pink shaded box. **b.** Genotypes from embryos of a cross between 889.1M and a *kdra*<sup>um6</sup> heterozygous female. Embryos are the same as shown in Figure 4 (Lane numbers are indicated). **c.** SNP genotyping of embryos derived from an in-cross of *kdra*<sup>um6</sup> heterozygote carriers.

**Supplementary Table 1.**

Solexa sequence reads and statistical analysis of ZFN-induced lesions at on- and off-target sites.

|                                                      | Untreated | 10 pg "normal"                              | 10 pg "monster" | 20 pg "monster" |
|------------------------------------------------------|-----------|---------------------------------------------|-----------------|-----------------|
| <b>All Sequence Reads</b>                            |           |                                             |                 |                 |
| Correct @ off-target site                            | 8230      | 8281                                        | 10957           | 10649           |
| Correct @ on target site                             | 34        | 21                                          | 20              | 28              |
| Indel* @ off-target site                             | 0         | 2                                           | 6               | 9               |
| Indel @ on-target site                               | 0         | 4                                           | 2               | 4               |
| <b>Statistical Analysis on-target vs. off-target</b> |           |                                             |                 |                 |
| p-value                                              | NA        | 9.53E-10                                    | 0.00011         | 4.64E-08        |
| estimated odds ratio                                 | NA        | 772.7                                       | 180.2           | 166.9           |
| 95%conf lower bound odds ratio                       | NA        | 103.5                                       | 16.9            | 35.9            |
| 95%conf upper bound odds ratio                       | NA        | 8192                                        | 1070.5          | 635.4           |
|                                                      |           |                                             |                 |                 |
| <b>Only Heterodimeric ZFN sequence reads</b>         |           |                                             |                 |                 |
| Correct @ off-target site                            | 1278      | 1193                                        | 1061            | 1634            |
| Correct @ on target site                             | 34        | 21                                          | 20              | 28              |
| Indel @ off-target site                              | 0         | 2                                           | 5               | 8               |
| Indel @ on-target site                               | 0         | 4                                           | 2               | 4               |
| <b>Statistical Analysis on-target vs. off-target</b> |           |                                             |                 |                 |
| p-value                                              | NA        | 2.01E-06                                    | 0.0077          | 4.90E-05        |
| estimated odds ratio                                 | NA        | 110.7                                       | 21              | 28.9            |
| 95%conf lower bound odds ratio                       | NA        | 14.9                                        | 1.9             | 6               |
| 95%conf upper bound odds ratio                       | NA        | 1291.7                                      | 137.7           | 115.7           |
|                                                      |           |                                             |                 |                 |
| <b>Experimental comparisons</b>                      | Overall   | Pairwise comparison vs. untreated sequences |                 |                 |
| p value heterodimeric ZFN sequence reads             | 0.02452   | 0.23                                        | 0.019           | 0.011           |
| p value all sequence reads                           | 0.02523   | 0.49                                        | 0.041           | 0.006           |

\* - "Indel" = insertions and deletions in spacer region

| ID#                                     | # emb | Fertilization |      | at 24 hpf |      | GFP+ |      | circ+ | circ- | % mutants | germ cell mosaicism |
|-----------------------------------------|-------|---------------|------|-----------|------|------|------|-------|-------|-----------|---------------------|
|                                         |       | #             | rate | dead      | mon. | SeA+ | SeA- |       |       |           |                     |
| 883.1M                                  | 300   | 187           | 62%  | 7         | 0    | 94   | 0    | 180   | 0     | 0%        | 0%                  |
| 883.2M                                  | 108   | 64            | 59%  | 0         | 0    | 15   | 2    | 31    | 11    | 26%       | 52%                 |
| 883.3M                                  | ~100  | 0             | 0%   | -         | -    | -    | -    | -     | -     | -         | -                   |
| 883.4M                                  | 148   | 86            | 58%  | 0         | 0    | 42   | 0    | 86    | 0     | 0%        | 0%                  |
| 883.5M                                  | 304   | 277           | 91%  | 63        | 0    | 107  | 0    | 214   | 0     | 0%        | 0%                  |
| 883.4F                                  | 214   | 173           | 81%  | 10        | 6    | 77   | 0    | 157   | 0     | 0%        | 0%                  |
| 883.5F                                  | 0     | -             | -    | -         | -    | -    | -    | -     | -     | -         | -                   |
| 883.6F                                  | 77    | 50            | 65%  | 0         | 0    | 21   | 0    | 50    | 0     | 0%        | 0%                  |
| 883.7F                                  | 55    | 53            | 96%  | 2         | 0    | 21   | 2    | 43    | 8     | 16%       | 31%                 |
| 883.8F                                  | 77    | 76            | 99%  | 0         | 0    | 39   | 0    | 73    | 3     | 4%        | 8%                  |
| 889.1F                                  | 45    | 29            | 64%  | 0         | 0    | -    | -    | 29    | 0     | 0%        | 0%                  |
| 889.2F                                  | 50    | 28            | 56%  | 0         | 0    | -    | -    | 28    | 0     | 0%        | 0%                  |
| 889.1M                                  | 305   | 198           | 65%  | 5         | 0    | -    | -    | 181   | 12    | 6%        | 12%                 |
| 889.2M                                  | 202   | 175           | 87%  | 1         | 0    | -    | -    | 174   | 0     | 0%        | 0%                  |
| 889.3M                                  | 117   | 101           | 86%  | 0         | 0    | -    | -    | 74    | 27    | 27%       | 53%                 |
| 889.4M                                  | 130   | 50            | 38%  | 0         | 0    | -    | -    | 48    | 2     | 4%        | 8%                  |
| 889.5M                                  | 222   | 209           | 94%  | 0         | 0    | -    | -    | 209   | 0     | 0%        | 0%                  |
| 889.6M                                  | 108   | 10            | 9%   | 2         | 7    | -    | -    | 0     | 1     | -         | -                   |
| 889.7M                                  | 29    | 22            | 76%  | 0         | 0    | -    | -    | 19    | 3     | 14%       | 27%                 |
| 889.8M                                  | 151   | 126           | 83%  | 0         | 0    | -    | -    | 126   | 0     | 0%        | 0%                  |
| <i>kdra<sup>um6</sup></i><br><i>inx</i> | 326   | 216           | 66%  | 2         | 5    | 117  | 35   | 155   | 56    | 27%       | 53%                 |

**Supplementary Table 2.** Identification and characterization of ZFN founders. Results are from embryo clutches from initial out-cross of indicated ZFN founder to *kdra<sup>um6</sup>* heterozygous carriers. Putative ZFN allele bearing founders are indicated in yellow. ID# is a family number followed by an individual identifier. Thus, 883 and 889 are separate families derived from separate injections. M – male founder, F – female founder. GFP+ refers to crosses in which the *kdra<sup>um6</sup>* heterozygote also harbored *Tg(fli1:egfp)<sup>y1</sup>*. SeA(+/-) - scored for presence or absence of segmental arteries at 30 hours post fertilization (hpf). Circ(+/-) – scored for presence or absence of circulation at 48 hpf. Males 883.3 and 889.6 failed to fertilize eggs on subsequent crosses against gravid females (data not shown). Circ- embryos from female 883.8 also displayed other defects, including split axis. No defects were apparent on subsequent crosses.

| Founder       | First cross   |        |             |    |           | Second cross* |      |             |    |          |
|---------------|---------------|--------|-------------|----|-----------|---------------|------|-------------|----|----------|
|               | Fertilization |        | circulation |    |           | Fertilization |      | circulation |    |          |
|               | #             | rate   | +           | -  | % mutants | #             | rate | +           | -  | %mutants |
| <b>883.2M</b> | 64            | 59%    | 31          | 11 | 26%       | 339           | 86%  | 42          | 20 | 32%      |
| <b>883.7F</b> | 53            | 96%    | 43          | 8  | 16%       | -             | -    | -           | -  |          |
| <b>889.1M</b> | 198           | 64%    | 181         | 12 | 6%        | 389           | 91%  | 95          | 9  | 9%       |
| <b>889.3M</b> | 101           | 86%    | 74          | 27 | 27%       | 316           | 92%  | 67          | 26 | 28%      |
| <b>889.4M</b> | 50            | 38%    | 48          | 2  | 4%        | 336           | 92%  | 70          | 3  | 4%       |
| <b>889.7M</b> | 22            | 75%    | 19          | 3  | 14%       | 323           | 93%  | 54          | 16 | 23%      |
| um6 inx       | 216           | 66.26% | 155         | 56 | 27%       | 150           | 94%  | 122         | 28 | 19%      |

**Supplementary Table 3.** Fertilization rates and proportion of mutant embryos in successive ZFN founder crosses. In both cases, indicated founders were individually crossed against *kdra<sup>um6</sup>* heterozygotes. Data from first cross are derived from Supplemental Table 1. Circulation was scored at 48 hours post fertilization. Female 883.7 failed to produce eggs in her second mating. \* - only a random sampling of embryos was scored for circulatory defects in the second cross.

**Supplementary Table 4.** Genetic lesions and frequency of occurrence in mutant embryos from ZFN mutation bearing founders.

| Founder | Phenotypic scoring <sup>1</sup> |       |           | Lesion                | Frequency <sup>2</sup> |
|---------|---------------------------------|-------|-----------|-----------------------|------------------------|
|         | circ+                           | circ- | % mutants |                       |                        |
| 883.2 M | 31                              | 11    | 26%       | 4 bp deletion         | 21/34                  |
| 883.7 F | 43                              | 8     | 16%       | variable <sup>3</sup> | 4/39                   |
| 889.1 M | 181                             | 12    | 6%        | 4 bp insertion        | 18/34                  |
| 889.3 M | 74                              | 27    | 27%       | 24 bp deletion        | 17/39                  |
| 889.7 M | 19                              | 3     | 14%       | 8 bp insertion        | 19/33                  |

**1.** “Phenotypic scoring” – observation of circulation at 48 hours post fertilization. “Mutant” embryos display no circulation. Scoring data is same as in Supplementary Table 1 for indicated founders. **2.**

“Frequency” is the number of **mutant** exon 2 sequences **over total number** of sequences obtained from shotgun cloning of PCR fragments from *pooled sibling mutant* embryos. Since mutant embryos were derived from a cross between a ZFN founder and a *kdra*<sup>um6/+</sup> carrier, we expect approximately 50% of *kdra* exon 2 alleles will be wild type and 50% mutant. Deviation from this proportion, or the appearance of more than one lesion would suggest the existence of multiple alleles. **3.** Two distinct mutant alleles were identified in embryos from 883.7F founders: a 382 bp deletion and a 12 bp deletion (see Supplementary Fig. 10c).

## Supplemental Table 5. Off-site PCR primer information

Chr (chromosome) and pos (position) refer to coordinates in Zv7

### off-target heterodimer primers

| Chr | pos      | ZFN site                 | 5' primer (ZFN proximal)              | 3' primer                              |
|-----|----------|--------------------------|---------------------------------------|----------------------------------------|
| 2   | 40209400 | CACACACTCCACGCGCGGTGGGA  | GCGCctgaagAAAACACAAGCTCTAATTGCCTCACA  | GCGCctgaagCAGTCATTATGTTTGCATTACAAGG    |
| 24  | 17282892 | CACACCGTCATTAGCCGCTGGGA  | GCGCctgaagTGCTCGCTGAATGCGTCTCCACA     | GCGCctgaagCTTTAAGGTCCACTGTACAATAAAGG   |
| 24  | 17509645 | TCCAACCAGAAATCGAGGGTGTG  | GCGCctgaagAGCATTACATGTTTTGAGAAAATCCA  | GCGCctgaagTGTTACCAATGTTAATATTTAATTCAGG |
| 5   | 28435365 | TCCCACATCTGTAGAGGGTGTG   | GCGCctgaagTGACCACAAAAAATCACATACTCCC   | GCGCctgaagCTAAATTAATGAATATTGAGCAATTGGG |
| 13  | 26355883 | TCCTACCACATGTGAGGGTGTG   | GCGCctgaagAATTCTTGTCTTTCTCTCCTCCT     | GCGCctgaagAAAGAAAAGCAGAAATCATTACCTAAT  |
| 17  | 48663741 | TCCCACCCCTCATGGATAGTGTG  | GCGCctgaagTGCTGAGCTGGCATCACAATCCC     | GCGCctgaagCAGGTGAAGAGCTTTACAATTACAGA   |
| 6   | 27321737 | CACACCCTCTTCGCTTGTGGGA   | GCGCctgaagCAGCAAGCGTGAGCCCTCCACA      | GCGCctgaagCCTGCAGCTCTCACATGGGCTG       |
| 16  | 7576157  | CACACGTTCTGTGTTAAGGTGGGA | GCGCctgaagTGACAATCTTACACAAACTCACAC    | GCGCctgaagAAAATCTGACCCTCACAAGTACAGTC   |
| 16  | 24055188 | CACACCATCCTACCTTTGGTGGGT | GCGCctgaagTTTGTGTATGTATGCATCTAAACACAC | GCGCctgaagAAATGCAAGCCACATAATGTACTGTAC  |
| 18  | 30932339 | CACACATTCTGCTTTCTGGTGGGA | GCGCctgaagATTTTCCACCTACTCTTCTCCACAC   | GCGCctgaagGATGTGGTTCACTGAACATTTACATTC  |
| 10  | 13078601 | CAGACCATCATCAGGTGGTGGGA  | GCGCctgaagCATCTACACAGACACACTGCAGAC    | GCGCctgaagGAAAACAAATGATGCTGAAATAAGTTAC |
| 5   | 7717307  | TCCCACCCAGAAAGTGTGGTGTG  | GCGCctgaagTAAAGAGAGCGCTCATCTCTCCCA    | GCGCctgaagCCACCTTCGACATCTCAATAGAGTC    |
| 7   | 31397854 | TCCCACCCGAGTCTGCAGGTGTG  | GCGCctgaagCATTACACAAACACAGCTCAATCCCA  | GCGCctgaagCGAGCGTAGAGCCACATGTAAG       |
| 2   | 23206696 | TCCCACCTTTGGTTGATGGTGTG  | GCGCctgaagTTCGTCTCAATCAGAGTCAATCCCA   | GCGCctgaagTTCATTAATAATGTTGCCTCACTTTCAA |
| 13  | 25900641 | TCCCATCAATGTTGTGAAGGTGTG | GCGCctgaagCTGTAAGACATAATAACAGTATCCCA  | GCGCctgaagCATTCTGTGAGCAGAAATCCCCCA     |
| 12  | 15778558 | TCCCACCAAACTAGACGTTGTG   | GCGCctgaagGTTTTATTTTATTTTGAAGAAACGTC  | GCGCctgaagAGTCCGACGTCATATGTCGACCA      |
| 15  | 30156993 | TCCCACCAAACTAGACGTTGTG   | GCGCctgaagTTTGGTCATGTGATATCAACATCCCA  | GCGCctgaagAGTCCGACGTCATATGTCACCCAG     |

### off-target homodimer primers

| Chr | pos      | ZFN site                 | 5' primer (ZFN proximal)             | 3' primer                                |
|-----|----------|--------------------------|--------------------------------------|------------------------------------------|
| 14  | 30956533 | CACACGATCCTGATGACGGTGTG  | GCGCctgaagAGGCAAGTTTGTGCCCTGCCACA    | GCGCctgaagTCATAAGTTGCATTGATGATGCCCC      |
| 7   | 42818862 | CAGACCTTCCAGTTGACGGTGTG  | GCGCctgaagTGTTGACTCTTTCCACAACCTCCAGA | GCGCctgaagGGTGGCTCTTGTCTCTGTCACT         |
| 15  | 7510964  | GACACCCTCATCAAGAAGGTGTG  | GCGCctgaagCATCGACATCAAGGTCAACAATGACA | GCGCctgaagCAAATCAACTCTCTAACCTGATTAATT    |
| 19  | 30922679 | CACACTGTCCTGGTGAGGGTGTG  | GCGCctgaagGATTGGGGGAAAAACATTTACACACA | GCGCctgaagTTATGAAGACACAGCTAATGCATATAG    |
| 20  | 41407585 | CACACTCTACCACTGAGGGTGTG  | GCGCctgaagACATCGCTGTCTCACTCACAC      | GCGCctgaagGCAGGGCCAGTGGAACTCAGG          |
| 18  | 40217861 | TGCCACCATTGGAGTTGGTGGGA  | GCGCctgaagCTGCCAACATTTGTCAACCTGCCA   | GCGCctgaagGTTGCCAACCTTGGTATAGTATCCA      |
| 19  | 38699383 | CACACGGTCACAACAGACGGTGTG | GCGCctgaagAGAGACGGACATATTAGCCACAC    | GCGCctgaagGGGACCCAAGTGAATCGGACC          |
| 21  | 17855081 | CACACCATCAAGGGAGAGGGTTTG | GCGCctgaagAGCCTTGGGGATCCAAAAACACAC   | GCGCctgaagCAGTAGTGAATGATGTTTGTGTTGTT     |
| 5   | 51241235 | TTCCACCAGCTTCTGTTGGTGGGA | GCGCctgaagTCCAATTCGTTCTCCTGCGTTCCA   | GCGCctgaagGCCTGTTTGCACCTCCTCAAAGG        |
| 4   | 18062432 | CACACCCTCTCACTGGTGTG     | GCGCctgaagCGCTGTCTCCCGAGTACCCACA     | GCGCctgaagCCCCTGTCTCCACACACAAACTG        |
| 4   | 23336953 | CACACCTTCACTGTGAGGATGAG  | GCGCctgaagATGTCTTTCACAGCAAGCCACACA   | GCGCctgaagAATACACAAGGTGCATTTATGATCTAAG   |
| 4   | 29941926 | CACACACTCATTGACGGTGTG    | GCGCctgaagCAGATGCTTGCCTAGATTGAACACA  | GCGCctgaagTCTTTCCCCTCGTCTATCGATGTG       |
| 5   | 21630841 | CACAGCCTCAGACAGATGATGTG  | GCGCctgaagCAGAAACCACAAGCTGTTTATACACA | GCGCctgaagAGACACAGAGGAATAAACCAAACCTG     |
| 5   | 24806109 | CACACCCACAAATTCAGGGTGTG  | GCGCctgaagCTGAGTTGTCCCTAGGGGTACA     | GCGCctgaagTCATACACTGCTTGTCTGCCAAGG       |
| 2   | 5408316  | CACACCGTCTCTTTGAAGGAGTT  | GCGCctgaagAAATGCTAGAGATCCTGCACACACA  | GCGCctgaagTATGATGTTGTTCTTGACTTCATCCTT    |
| 2   | 29953473 | TACCACCACGCACCTTGGTGGGT  | GCGCctgaagTGCCAGATGGCAGTTTTTGTACC    | GCGCctgaagAACACGTTCCGTGCAGGTGACGC        |
| 2   | 44624948 | CACAACCTCAGAAAGAAGGAGTG  | GCGCctgaagTGAGAACATTTGGAGGTTACCCACA  | GCGCctgaagAAGTTTTGGCAAGCACATTATCCCTG     |
| 1   | 20116979 | TCCCACCATCACACTATGTGGGA  | GCGCctgaagTGCTTTGACAGCAGTTACACTCCC   | GCGCctgaagGATTAGGGAGTTAAACAGAGGGAAAT     |
| 1   | 55323    | ATCAACATCTACAGGACGGTGTG  | GCGCctgaagGGCGCTGTTGGTCCAGTACATCA    | GCGCctgaagGCGAGGCTGGGGTCAGGCC            |
| 3   | 5485267  | CTCACCTTCTGGCAGACGCTGTG  | GCGCctgaagTTATGTATCAGGGATGAAAATACTCA | GCGCctgaagTTTCAATACAAAAGTGGAAAGATGGCT    |
| 3   | 11650710 | CTCTCCGTCTCGTGGATGGTGTG  | GCGCctgaagTGCAGGGTGGTGTCTGCTCT       | GCGCctgaagCAGATTCAGTGTGCTGCTCACTCG       |
| 3   | 13074803 | CACAGTATCCGTTGACGGTGTG   | GCGCctgaagGAGACACTCCCAATATGAGTATCACA | GCGCctgaagAATATCAATCTAAAATCGATAAAAGTCCCT |
| 3   | 28470201 | CACAACATCACAGAGAAGCTGTG  | GCGCctgaagCCCTCACAGAGTCTGGCATCACA    | GCGCctgaagCTCACACAAAAACACATTTAAAAGTATCA  |
| 3   | 43597602 | CACACAATATGGTGGAAAGGTGTG | GCGCctgaagTATCTACTTTGTCTTTGAGGAGCACA | GCGCctgaagGTGTCAACCCATCTTCTCATCTTC       |



## Supplementary Methods.

### Additional Zinc Finger Library information

Putative high confidence specificity determinants:

| DNA Subsite<br>(5' -> 3') | Recognition Helix Positions<br><u>-1,1,2,3,5,6</u> | Structure w/ recognition motif<br>(PDB ID) |
|---------------------------|----------------------------------------------------|--------------------------------------------|
| <b>GNN</b>                | <b>XXXXTR</b>                                      | 1AAY                                       |
| NGN                       | XXXHXX                                             | 1AAY                                       |
| <b>NNG(g/t)</b>           | <b>RSDXXX</b>                                      | 1AAY                                       |
| NAN                       | XXXNXX                                             | 1MEY & 1G2D                                |

Positions within the recognition helix could be engineered with reasonable confidence when a purine base occurs at a position within the DNA subsite (bold DNA bases and corresponding amino acids, where the number indicates the position of the residue relative to the start of the alpha helix). For example when G occurs at the 5' end of a subsite the residues at positions 5 and 6 of the recognition helix can be fixed as T and R respectively. This particular recognition motif is present in finger 1 of the Zif268 structure. For each recognition motif listed in the table, a ZFP-DNA structure is listed as a Protein Data Bank ID that contains the recognition motif. The lower case residue at the 3' end of the **NNG** subsite indicates the necessity to consider binding site overlap between neighboring fingers. Position 4 of the recognition helix is not considered as it plays a structural role and thus is always encoded as leucine, which is the most common residue found in zinc finger populations at this position.

#### Creating zinc finger libraries for finger 1 subsite GGAc (TTGGTGGGAc) and GTGt (GAAGGTGTGt)

Finger 1 modules specific for the GAAC subsite were selected in the context of a 3-finger framework to recognize the target site 5'-GCTGCGGAc-3'. Based on recognition elements within the structure of Zif268, three of the recognition positions (3, 5 & 6) were fixed. The anchor fingers at positions 2 and 3 were derived from the corresponding fingers of Zif268 with the exception that the recognition helix in finger 2 was replaced with RSDDELTR (position -1,1,2,3,4,5,6) to provide specificity for a GCG subsite and the recognition helix in finger 3 was replaced with QSSDLQR (position -1,1,2,3,4,5,6) to provide specificity for a GCT subsite

Finger 1 modules specific for the GTGt subsite were primarily designed based on the structure of Zif268, where five of the six positions within the recognition helix (every position but 3) were fixed. Because only a single position was randomized, this initial library was directly used in the PCR-based assembly of the final ZFP library for the second stage of selection.

Each constructed library exceeded the complexity of the encoded sequences: F1-GAA  $1.8 \times 10^5$  members, F1-GTG  $2 \times 10^4$  members.

Oligonucleotides:

F1-GGAc library:

C D R R F S X X X H L T R H I R I H T  
CCTGTGACCGCCGCTTCAGC>NNKNNKNNKACCTCACCCGCCACATCCGGATCCACAC

F1-GTG library:

C D R R F S R S D X L T R H I R I H T  
CCTGTGACCGCCGCTTCAGCCGTAGCGACNNKCTCACCCGCCACATCCGGATCCACAC

Complementary oligonucleotides:

5' : 5'-GCTGAAGCGGCGGTCA-3' ; 3' : 5'-  
GCCGGTGTGGATCCGGATGTGGCGGGTGAGGTG-3' .

### Creating zinc finger libraries for finger 2 subsite GTGg (TTGGTGGGAc) and GGTg (GAAGGTGTGt)

Finger 2 modules specific for the GTGg subsite were designed and utilized as described for the GTGt Finger 1 subsite above

Finger 2 modules specific for the GGTg subsite were selected in the context of a 3-finger framework to recognize the target site 5'- GCT**GGT**GCG -3'. Based on recognition elements within the structure of Zif268, three of the recognition positions (3, 5 & 6) were fixed. The anchor finger at positions 3 was derived from the corresponding finger of Zif268 with the exception that the recognition helix was replaced with QSSDLQR (position -1,1,2,3,4,5,6) to provide specificity for a GCT subsite.

Each constructed library exceeded the complexity of the encoded sequences: F2-GGT  $5.8 \times 10^5$  members and F2-GTG  $1.3 \times 10^4$  members.

Oligonucleotides:

F2-GGT library:

C M R N F S X X X H L T R H I R T H T  
CTGCATGAGGAACTTCAGC>NNKNNKNNKACCTCACCCGCCACATCCGCACACACAC

F2-GTG library:

C M R N F S R S D X L T R H I R T H T  
CTGCATGAGGAACTTCAGCCGCAGCGACNNKCTCACCCGCCACATCCGCACACACAC

Complementary oligonucleotides:

5' : GCTGAAGTTCCTCAT ; 3' : GCCGGTGTGTGTGCGGATGTGGCGGGTGAG

### Creating zinc finger libraries for finger 3 subsite TGGg (TTGGTGGGAc) and GAAg (GAAGGTGTGt)

Finger 3 modules specific for the TTGg subsite were selected in the context of a 3-finger framework to recognize the target site 5'- **TTG**GCGGCG -3'. Based on recognition elements within the structure of Zif268, three of the recognition

positions (-1, 1 & 2) were fixed. The anchor fingers at positions 2 and 3 were derived from the corresponding fingers of Zif268 with the exception that the recognition helix in finger 2 was replaced with RSDDLTR (position -1,1,2,3,4,5,6) to provide specificity for a GCG subsite.

Finger 3 units specific for the GAAG subsite were selected in the context of a 3-finger framework to recognize the target site 5'- **GAAGCGGCG** -3'. Based on recognition elements within the structure of Zif268, three of the recognition positions (3, 5 & 6) were fixed. The anchor fingers at position 2 was derived from the corresponding finger of Zif268 with the exception that the recognition helix was replaced with RSDDLTR (position -1,1,2,3,4,5,6) to provide specificity for a GCG subsite.

Each constructed library exceeded the complexity of the encoded sequences within the recognition helix : F3-GAA  $5.7 \times 10^5$  members and F3-TTG  $2.3 \times 10^5$  members.

Oligonucleotides:

F3-GAA library:

C G R K F A X X X N L T R H T K I H  
CTGCGGCAGGAAGTTCGCGNKNKNNKAACCTCACCCGCCACACCAAGATCCACA

F3-TTG library:

C G R K F A R S D X L X X H T K I H  
CTGCGGCAGGAAGTTCGCGCGCAGCGACNNKCTCANNKNNKCACACCAAGATCCACA

Complementary oligonucleotides:

5' : CGCGAACTTCCTGCC; 3' : CCCGTGTGGATCTTGGTGTG

### **pH3U3 reporter vectors**

Binding sites for each ZFP were cloned into the pH3U3 reporter vector between the BspEI and EcoRI such that the 3' end of the binding site was located 10 bp upstream of -35 box of the promoter.

Example:

Top oligonucleotide: CCGGT**GCGGCGGG**ACTGTG

Bottom oligonucleotide: AATTCACAGT**CCCGCCGCA**

### **ZFP library assembly primers**

Primers used for single finger extraction:

Finger 1

F1forward CAAGAGCAGGAAGCCGCTG

F1reverse CACTGGAAGGGCTTCTGGCCTGTGTGAATCCGGATATG

Finger 2

F2forward

TATCCGGATTCACACAGGCCAGAAGCCCTTCCAGTGTTCGCATCTGC

F2reverse ATGTCGCATGCAAAAGGCTTCTCGCCTGTGTGGGTGCGGATGTG

Finger 3

F3forward: CGAGAAGCCTTTTGCATGCGACA  
F3reverse: GTAGGATCCACCTGTATGGATTTTGGTGTG

### Off-target site identification

Off-target sites with the highest propensity to be recognized by the exon 2 ZFNs were identified by searching the genome (Zv7 repeat-masked) for matches to the consensus sequence for each ZFP based on their determined specificity ('GAXGGTGTG' and 'XXGGTGGGA', where X allows any base) with the appropriate spacing (5 or 6 bp) and orientation using a Perl algorithm. Heterodimer off-target sites were derived from sites that match 14 of 15 bp (*kdra* exon 2 is the only 15 of 15 bp match). Homodimeric sites were derived from sites that match either the 'GAXGGTGTG' composite site at 14 or 15 out of 16 bp or the 'XXGGTGGGA' composite site at 14 of 14 bp. A list of these sites is provided in Supplementary Table 5.

### Off-target site lesion adaptor sequences

Barcodes were appended to oligonucleotides adaptor sequences originally designed for Solexa sequencing (© 2006 Illumina, Inc, All rights reserved). The sequences for each adaptor pair are as follows (underlined nucleotides indicate barcode; "p" indicates 5' phosphate):

#### Adapter strand1-AA

p-AAAGATCGGAAGAGCTCGTATGCCGTCTTCTGCTTG

#### Adapter strand2-AA

ACACTCTTTCCCTACACGACGCTCTTCCGATCTTTT

#### Adapter strand1-AC

p-ACAGATCGGAAGAGCTCGTATGCCGTCTTCTGCTTG

#### Adapter strand2-AC

ACACTCTTTCCCTACACGACGCTCTTCCGATCTGT

#### Adapter strand1-AG

p-AGAGATCGGAAGAGCTCGTATGCCGTCTTCTGCTTG

#### Adapter strand2-AG

ACACTCTTTCCCTACACGACGCTCTTCCGATCTCT

#### Adapter strand1-AT

p-ATAGATCGGAAGAGCTCGTATGCCGTCTTCTGCTTG

#### Adapter strand2-AT

ACACTCTTTCCCTACACGACGCTCTTCCGATCTATT
